# Supplementary material
Source: Springer Nature journal article supplement (http://www.springermedizin.de/resource/supplementary/13063_2010_576_MOESM1_ESM.pdf/9618778)
Supplement: MOESM1 [file 9618778]

# 140 Patients with COPD

Written Consent

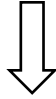

Randomization

## Inclusion Visit

- Sociodemographic profile
- Clinical characteristic
- Social support
- Family Support
- Quality of life
- Prescribed treatment
- Treatment adherence

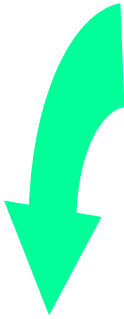

## Control Group 70 patients

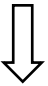

### Visit 1

(3 months after inclusion)

- Variables changes
- Treatment adherence

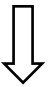

### Visit 2

(6 months after inclusion)

- Variables changes
- Treatment adherence

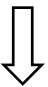

### Visit 3

(12 months after inclusion)

- Sociodemographic profile
- Clinical characteristic
- Social support
- Family support
- Quality of life
- Variables changes
- Treatment adherence

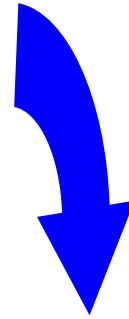

## Intervention Group 70 patients

Group session

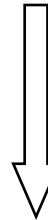

## Intervention

Motivational aspect  
Cognitive aspects  
Skills development

### Visit 1

(3 months after intervention)

- Variables changes
- Treatment adherence
- Intervention reinforcement

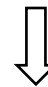

### Visit 2

(6 months after intervention)

- Variables changes
- Treatment adherence
- Intervention reinforcement

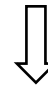

### Visit 3

(12 months after intervention)

- Sociodemographic profile
- Clinical characteristic
- Social support
- Family support
- Quality of life
- Variables changes
- Treatment adherence
